**Article type: Research Article**

**Title: Under-the-radar dengue virus infections in natural populations of *Aedes aegypti* mosquitoes**

**Running title: Dengue virus maintenance in mosquito vectors**

**Authors:** Sean M. Boyles<sup>1,2,8\*</sup>, Carla N. Mavian<sup>1,3\*</sup>, Esteban Finol<sup>4\*</sup>, Maria Ukhanova<sup>1,5\*\*</sup>,

Caroline J. Stephenson<sup>1,6,8\*\*</sup>, Gabriela Hamerlinck<sup>1,7,8</sup>, Seokyoung Kang<sup>1,2,8</sup>, Caleb

Baumgartner<sup>9</sup>, Mary Geesey<sup>9</sup>, Israel Stinton<sup>9</sup>, Kate Williams<sup>9</sup>, Derrick K. Mathias<sup>8,10</sup>, Mattia

Prosperi<sup>5</sup>, Volker Mai<sup>1,5</sup>, Marco Salemi<sup>1,3</sup>, Eva A. Buckner<sup>8,9,10</sup>, John A. Lednicky<sup>1,6,8</sup>, Adam R.

Rivers<sup>8,11\*\*\*</sup>, Rhoel R. Dinglasan<sup>1,2,8\*\*\*</sup>

**Affiliations:**

<sup>1</sup>Emerging Pathogens Institute, University of Florida, Gainesville, Florida, 32611, USA

<sup>2</sup>Department of Infectious Diseases & Immunology, College of Veterinary Medicine, University of Florida, Gainesville, Florida 32611, USA

<sup>3</sup>Department of Pathology, College of Medicine, University of Florida, Gainesville, Florida 32611, USA

<sup>4</sup>Institute for Molecular Biology and Biophysics, ETH Zurich, Zurich 8093, Switzerland

<sup>5</sup>Department of Epidemiology, College of Public Health and Health Professions & College of Medicine, University of Florida, Gainesville, Florida, 32610, United States.

<sup>6</sup>Department of Environmental and Global Health, College of Public Health and Health Professions, University of Florida, Gainesville, Florida, 32610, USA

<sup>7</sup>Department of Geography, College of Liberal Arts & Sciences, University of Florida, Gainesville, Florida 32610, USA

<sup>8</sup>CDC Southeastern Center of Excellence in Vector Borne Diseases, Gainesville, Florida 32611, USA

<sup>9</sup>Manatee County Mosquito Control District, Palmetto, Florida 34221, United States.

<sup>10</sup>Florida Medical Entomology Laboratory, Institute of Food and Agricultural Sciences, University of Florida, Vero Beach, Florida 32962, USA

<sup>11</sup>Genomics and Bioinformatics Research Unit, Agricultural Research Service, United States Department of Agriculture, Gainesville, Florida 32608, USA

## **Author footnotes:**

\*Sean M. Boyles, Carla N. Mavian and Esteban Finol all contributed equally to this manuscript.

\*\*Maria Ukhanova and Caroline J. Stephenson also contributed equally to this manuscript.

\*\*\*Adam R. Rivers and Rhoel R. Dinglasan are co-senior authors.

**Corresponding Author:** Dr. Rhoel R. Dinglasan

Phone: 352-294-8448

FAX: 352-392-9704

E-mail: [rdinglasan@epi.ufl.edu](mailto:rdinglasan@epi.ufl.edu)

Address: University of Florida Emerging Pathogens Institute, 2055 Mowry Road, Gainesville, Florida 32611 USA

**Abstract Word Count:** 204 (Excludes title and key words)

**Importance Section Word Count:** 148

**Text Word Count:** 4,662 (Main text; excludes “Abstract” and “Importance”)

## **Disclaimers**

Not applicable

## **Sources of Funding**

This research was supported in part by the United States Centers for Disease Control (CDC) Grant 1U01CK000510-03: Southeastern Regional Center of Excellence in Vector-Borne Diseases: The Gateway Program. The CDC had no role in the design of the study, the collection, analysis, and interpretation of data, or in writing the manuscript. Support was also provided by the University of Florida Emerging Pathogens Institute and the University of Florida Preeminence Initiative to RRD for this study.

## **Number of Figures & Tables**

Number of Figures = 4

Number of Supplementary Figures = 4

Number of Supplementary Tables= 2

## **Conflicts of Interest**

The authors declare no competing interests.

## Abstract

The incidence of locally acquired dengue infections increased during the last decade in the United States, compelling a sustained research effort on the dengue mosquito vector, *Aedes aegypti*, and its microbiome, which has been shown to influence virus transmission success. We examined the ‘metavirome’ of four populations of *Ae. aegypti* mosquitoes collected in 2016-2017 from Manatee County, Florida. Unexpectedly, we discovered that dengue virus serotype 4 (DENV4) was circulating in these mosquito populations, representing the first documented case of such a phenomenon in the absence of a local DENV4 human case in this county over a two-year period. We confirmed that all of the mosquito populations carried the same DENV4 strain, assembled its full genome, validated infection orthogonally by reverse transcriptase PCR, traced the virus origin, estimated the time period of its introduction to the Caribbean region, as well as explored the viral genetic signatures and mosquito-specific virome associations that potentially mediated DENV4 persistence in mosquitoes. We discuss the significance of prolonged maintenance of these DENV4 infections in *Ae. aegypti* that occurred in the absence of a DENV4 human index case in Manatee County with respect to the inability of current surveillance paradigms to detect mosquito vector infections prior to a potential local outbreak.

## Importance

Since 1999, dengue outbreaks in the continental United States (U.S.) involving local transmission have occurred episodically and only in Florida and Texas. In Florida, these episodes appear to be coincident with increased introductions of dengue virus into the region through human travel and migration from endemic countries. To date, the U.S. public health

response to dengue outbreaks is largely reactive, and implementation of comprehensive arbovirus surveillance in advance of predictable transmission seasons, which would enable proactive preventative efforts, remains unsupported. The significance of our finding is that it is the first documented report of non-outbreak DENV4 transmission and maintenance within a local mosquito vector population in the continental U.S. in the absence of a human case during a two-year time period. Our data suggest that molecular surveillance of mosquito populations in high-risk, high tourism areas of the U.S., may allow for proactive, targeted vector control before potential arbovirus outbreaks.

**Key Words:** Dengue virus serotype 4, transmission, *Aedes aegypti*, DENV4, flavivirus, mosquito, arbovirus, surveillance, insect specific viruses

## 1 **Introduction**

2 Approximately 40% of the globe is at risk of infection by flaviviruses, such as dengue virus  
3 (DENV): an enveloped, single-stranded RNA virus transmitted primarily by *Aedes aegypti*  
4 mosquitoes [1,2]. Since severe disease from DENV infections can manifest as dengue  
5 hemorrhagic fever/dengue shock syndrome [1], DENV establishment in the continental United  
6 States is a major concern for public health agencies. In the USA, Florida has experienced  
7 increases in local DENV transmission since 2009 [3], driven in part by human and pathogen  
8 movement. *Ae. aegypti* is endemic throughout subtropical Florida and the vector population  
9 has resurged recently, following its near displacement by *Ae. albopictus* [4]. Autochthonous  
10 DENV infection occurs sporadically, primarily in Southern Florida with limited local cases  
11 elsewhere in the state [3]. In 2019, 16 cases of locally acquired DENV were reported for the  
12 state, including an area along the West-Central Florida Gulf Coast.

13  
14 Recently, reports have indicated that certain insect-specific viruses (ISVs) can negatively  
15 impact or enhance arbovirus (including DENV) infections in insect cells [5,6] and mosquitoes  
16 [7], respectively. Although the impacts of many ISVs on arboviral competence have yet to be  
17 determined, the evidence to date clearly indicates that the mosquito virome cannot be safely  
18 ignored and likely influences the risk of autochthonous DENV transmission once the virus is  
19 introduced into an area. Therefore, we conducted a metaviromic study of F<sub>1</sub> (first-generation,  
20 lab-raised mosquitoes from wild parents) *Ae. aegypti* adult females collected as eggs from  
21 ovitraps in 2016-2017 from Manatee County to assess the potential risk of flavivirus  
22 transmission outside of Southern Florida. Although no indexed human case of DENV4 was  
23 reported during 2016-2017 in the county, we detected and sequenced DENV4, which may

24 have been maintained vertically for at least one generation (but potentially more) in these *Ae.*  
25 *aegypti* mosquito populations along Florida's Gulf Coast. We followed up this unexpected  
26 finding with genetic analyses to determine the DENV4 strain's likely location of origin, assess  
27 the timeframe of virus introduction, and investigate strain-specific mutations that may have  
28 enabled adaptation to and/or persistence within local mosquito populations.

29

## 30 **Methods**

### 31 ***Mosquito sample preparation and viral RNASeq***

32 *Ae. aegypti* eggs were collected in ovitraps in the summers of 2016-2017 (May 15, 2016, and  
33 June 19, 2017) from four Manatee County sites (**Fig. 1a**). To avoid cross contamination of  
34 mosquito viromes, each year eggs from each site were hatched independently in distilled  
35 water, reared to adulthood, speciated and then frozen. Female abdomens were pooled (N=  
36 20/pool) separately for the four collection sites for a total of eight individual pools. Total RNA  
37 was extracted using the AllPrep DNA/RNA Mini Kit (Qiagen), and rRNA depleted with the  
38 NEBNext rRNA Depletion Kit (New England BioLabs). The NEBNext Ultra II Directional RNA  
39 Library Prep Kit (New England BioLabs) was used to prepare shotgun metagenomics libraries.  
40 Reverse-transcribed RNA libraries were sequenced using a HiSeq 3000 (Illumina) instrument  
41 in 2x101 run mode. The data were deposited into the NCBI Sequence Read Archive and  
42 Biosample archive under BioProject PRJNA547758.

43

### 44 ***Initial assembly and metavirome analysis***

45 BBduk (version 37.75; <https://sourceforge.net/projects/bbmap/>) was used to trim adaptor  
46 sequences and remove contaminants. *Ae. aegypti* sequences were removed using BBSplit

47 (<https://sourceforge.net/projects/bbmap/>) against the *Ae. aegypti* Liverpool genome  
48 (AaegL5.1). Non-mosquito reads were assembled using Spades (3.11.1) in metagenomics  
49 mode [8]. For each contig, local similarity search in protein space was run using Diamond  
50 (0.9.17) [9] against the NCBI NR database. Reads were mapped against assemblies using  
51 Bowtie (2.3.4.1) [10], then sorted/indexed using Samtools (1.4.1) [11]. Megan 6 [12] was used  
52 to assign contigs and read counts to the lowest common ancestor (LCA) and to view viral  
53 contigs. To estimate microbial community abundance, Diamond (0.9.17) [9] was used to  
54 search reads against the NCBI NR database, Megan 6 [12] was used to assign read counts to  
55 the LCA, and R (3.6.0) package Compositions [13] (1.40-2) was used to create a sub-  
56 composition of RNA (**Fig. 1b**). Compositional count data from the Megan [12] LCA  
57 classification was assessed by ALDEx2 [14, 15] to estimate the statistical significance of the  
58 change in DENV4 reads from 2016 to 2017. ALDEx2 [14, 15] uses a Dirichlet multinomial  
59 Monte Carlo simulation to estimate the variance of the centered log ratio (CLR) values for taxa  
60 amongst the reads. Using the variance of the CLR, ALDEx2 [14, 15] computes P-values  
61 using Welch's t-test and returns an effect size (CLR/variance) for the estimate. For a  
62 determination of the statistical significance of the observed decrease in CFAV reads from  
63 2016-2017, a linear regression fitted to the CLRs of the Anna Maria and Cortez site DENV4  
64 reads in 2016-2017 was utilized to yield an  $R^2$  value and a P-value to describe the trend.

65

#### 66 ***DENV4 refinement and genome-closing assembly***

67 Two contigs covering most of the genome with a small gap were obtained. To create a closed  
68 genome, a dataset of genomes for DENV1-4 (NC\_001477.1, NC\_001474.2, NC\_001475.2,  
69 NC\_002640.1) and the two assembled contigs were used. We selected reads sharing a 31-  
70 mer with the dataset using BBduk (<https://sourceforge.net/projects/bbmap/>), followed by



71 assembly with Spades in *meta* mode [8] and classification using Diamond [9] for a complete  
72 DENV4 genome. Read-mapping with Bowtie [10] revealed incorrect bases near the 3' end,  
73 which were manually corrected. The genome was annotated using the Genome Annotation  
74 Transfer Utility [16] from the Virus Pathogen Database and Analysis Resource (ViPR) [17].

75

### 76 ***Phylogenetic and Molecular Clock analyses***

77 Two hundred thirty-four DENV4 genome sequences from GenBank (**Table S1**) were aligned  
78 using MAFFT version 7.407 [18] with the L-INS-I method [19]. IQ-TREE software [20] was  
79 used to evaluate phylogenetic signal in the genomes by likelihood mapping [21] and to infer  
80 maximum likelihood (ML) phylogeny based on the best-fit model according to the Bayesian  
81 Information Criterion (BIC) [20, 22]. Statistical robustness for internal branching order was  
82 assessed by Ultrafast Bootstrap (BB) Approximation (2,000 replicates), and strong statistical  
83 support was defined as BB>90% [23].

84

85 To estimate when DENV4 entered Florida, we used 145 strains including all isolates from the  
86 Americas, related Asian and African isolates, and randomly reduced oversampled Brazilian  
87 isolates. The strains in this dataset were not recombinant, as assessed by scanning the  
88 alignments for possible recombination points using the RDP, GENECONV, MaxChi,  
89 CHIMAERA, and 3Seq algorithms implemented in the RDP4 software (available from  
90 <http://web.cbio.uct.ac.za/~darren/rdp.html>) [24]. Correlation between root-to-tip genetic  
91 divergence and date of sampling was conducted [25] to assess clock signal before Bayesian  
92 phylodynamic analysis. Time-scaled trees were reconstructed using the Bayesian  
93 phylodynamic inference framework in BEAST v.1.8.4 [26,27]. Markov Chain Monte Carlo  
94 (MCMC) samplers were run until 200/250 million generations to ensure Markov chain mixing,

95 assessed by calculating the Effective Sampling Size (ESS) of parameter estimates. The HKY  
96 substitution model [28] was used with empirical base frequencies and gamma distribution of  
97 site-specific rate heterogeneity. The fit of strict vs. relaxed uncorrelated molecular clock  
98 models, and constant size vs. Bayesian Skyline Plot [29] demographic models were tested.  
99 Marginal likelihood estimates (MLE) for Bayesian model testing were obtained using path  
100 sampling (PS) and stepping-stone sampling (SS) methods [30, 31]. The best model was of a  
101 strict clock and constant demographic size. The maximum clade credibility tree was inferred  
102 from the posterior distribution of trees using TreeAnnotator specifying a burn-in of 10% and  
103 median node heights, then edited graphically in FigTree v1.4.4  
104 (<http://tree.bio.ed.ac.uk/software/figtree/>), alongside ggtree available in R [32].

105

### 106 ***Single-nucleotide variation analyses***

107 The viral RNA sequencing reads were mapped onto the complete genome of seven DENV4  
108 strains. These strains represent all the known DENV4 lineages (accession numbers are  
109 provided in **Fig. 3c**). We also mapped the reads onto the assembled Manatee DENV4 full  
110 genome. The read mapping was performed in the Geneious platform (Geneious Prime®  
111 version 2019.2.1) using the “map to reference” function under standard settings (Mapper:  
112 Geneious; Sensitivity: Highest Sensitivity/Slow; Fine tuning: Iterate up to 5 times; no trim  
113 before mapping). The Single nucleotide variation quantification was performed in the same  
114 platform using the “find Variation/SNV” function under default settings.

115

### 116 ***DENV4 Genetic Analyses***

117 From the 234 DENV4 genome alignment, sequences corresponding to the NS2A gene were  
118 extracted to investigate selection pressure and mutations that potentially influenced adaptation

119 to and/or persistence in mosquito populations. Comparative selection and mutation analyses  
120 revealed NS2A as a relatively strong region of potential selection for the Manatee County  
121 genome. HyPhy algorithms were used to estimate non-synonymous (dN) to synonymous (dS)  
122 codon substitution rate ratios ( $\omega$ ), with  $\omega < 1$  indicating purifying/negative selection and  $\omega > 1$   
123 indicating diversifying/positive selection [33, 34]. Fast, unconstrained Bayesian approximation  
124 (FUBAR) [35] was used for inferring pervasive selection, and the mixed effects model of  
125 evolution (MEME) [36] to identify episodic selection. Sites were considered to have  
126 experienced diversifying/positive or purifying/negative selective pressure based on posterior  
127 probability (PP)  $> 0.90$  for FUBAR, and likelihood ratio test  $\leq 0.05$  for MEME.

128

129 To elucidate influential mutations in the Manatee DENV4 genome that potentially enabled  
130 persistence in the local mosquito population, a dN/dS analysis of the Manatee DENV4 against  
131 the relatively close, but geographically distant 1981 Senegalese DENV4 (MF004387.1) was  
132 conducted using JCoDA [37] with default settings, a 10-bp sliding window and a jump value of  
133 5. To further assess the selective pressure throughout coding sequences in the DENV4  
134 lineage that established transmission in Manatee County, we implemented a Single-Likelihood  
135 Ancestor Counting (SLAC) method [38] on the DataMonkey 2.0 web application [39]. It  
136 combines maximum-likelihood (ML) and counting approaches to infer nonsynonymous (dN)  
137 and synonymous (dS) substitution rates on a site-by-site basis for the different DENV4 coding  
138 alignments and corresponding DENV4 phylogeny. The measurements were performed on  
139 different alignments that included all strains, only genotype II strains, only clade IIa or IIb  
140 strains or only strains that are closely related to the DENV4 Manatee strain (multiple DENV4  
141 coding sequence alignments are available as a Mendeley dataset). NS2A and 2K peptide  
142 genes were individually aligned and inspected between closely related DENV4 strains (1994

143 Haitian (JF262782.1), 2014 Haitian #1 (KP140942.1), 2014 Haitian #2 (KT276273.1), 2015  
144 Haitian (MK514144.1), and 1981 Senegalese (MF004387.1) genomes) and the Manatee  
145 DENV4 for mutations to identify signals of adaptation of Manatee DENV4 to Floridian *Ae.*  
146 *aegypti*.

147

## 148 **Results**

### 149 ***DENV4 and ISVs in Ae. aegypti mosquitoes from Manatee County, Florida***

150 Our metaviromic analysis of female *Ae. aegypti* mosquitoes detected DENV4 alongside  
151 several ISVs across four sites in 2016 and only Anna Maria and Cortez sites in 2017 (**Fig. 1a**).  
152 A full DENV4 genome (MN192436) was constructed with an overall genome coverage of ~11X  
153 across the reads (**Fig. 2**). We observed that the 2017 DENV4 signal was much lower than  
154 2016 for Anna Maria and Cortez (**Fig. S1**) and although Palmetto had the highest proportion of  
155 2016 reads, this signal was virtually absent in 2017. To confirm DENV4 infection, we amplified  
156 and confirmed by direct sequencing the NS2A DENV4 amplicon for 2016 Longboat and  
157 Palmetto mosquito samples. Cumulatively, the drop in DENV4 relative to the metavirome from  
158 2016-2017 was statistically significant (effect size=-2.026; P=0.035).

159

160 The RNA metavirome profile of the Manatee *Ae. aegypti* indicated an abundance of  
161 *Partitiviridae*, *Anphevirus*, Whidbey virus, and cell fusing agent virus (CFAV). *Partitiviridae* are  
162 known to primarily infect plants, protozoa, and fungi, but all the abundant groups in the  
163 metavirome have previously been detected in mosquitoes. We noted that the highest levels of  
164 CFAV (Anna Maria and Cortez sites) in 2016 were associated with DENV4 persistence into

165 2017 ( $P=0.07109$ ;  $R^2= 0.7943$ ). Additionally, *Anphevirus* signals were notably abundant in the  
166 Palmetto samples in 2016 and 2017, coincident with DENV4 signal loss in Palmetto in 2017.

167

### 168 ***DENV4 Phylogenetic and Molecular Clock Analyses***

169 After analyzing the metavirome, we investigated the genome of the DENV4 strain to determine  
170 its likely source and assess the potential timeframe of introduction into Florida. Our first  
171 analysis confirmed the phylogenetic signal and absence of nucleotide substitution saturation  
172 (**Fig. S2a-b**). We subsequently explored Manatee County DENV4's phylogeny with a 234-  
173 genome DENV4 dataset constructed from GenBank sequences (**Table S1**) by maximum  
174 likelihood (ML) phylogenetic inference (**Fig. 3a**). The ML phylogeny showed three clades: two  
175 Asian clades, and one American clade with two Senegalese strains (MF00438, KF907503) and  
176 one Thai (KM190936) at the base (**Fig. 3a**). Manatee DENV4 can be classified as DENV4  
177 genotype IIb. The DENV4 genome obtained in Florida most closely clustered with two Haitian  
178 isolates from 2014 (KT276273, KP140942) and a cluster of Puerto Rican isolates (**Fig. 3a**).  
179 Further back, a Haitian isolate (JF262782) collected 20 years earlier also clustered with the  
180 Manatee-associated clade (**Fig. 3a**).

181

182 To estimate the most recent common ancestor (MRCA) for DENV4 entry into Manatee County,  
183 Florida, as well as date divergence of the strain with Haitian isolates, we performed a  
184 molecular clock analysis using a Bayesian evolutionary framework [29] on a reduced dataset  
185 including only the "Americas clade." We first assessed the phylogenetic signal and the  
186 absence of nucleotide substitution saturation (**Fig. S2c-d**) and then the temporal signal alone  
187 (**Fig. S3**). In the maximum clade credibility (MCC) tree, Manatee DENV4 clustered with the  
188 Haitian isolates from 2014 (Node A posterior probability [PP] > 0.9) (**Fig. 3b**). The MCC

189 phylogeny showed that the time of the MRCA (tMRCA) for the DENV4 Manatee isolate and  
190 Haitian isolates was 2010 (Node A in **Fig. 3b**). This 95% high posterior density interval for this  
191 tMRCA suggests that DENV4 may have entered Manatee County sometime between 2006-  
192 2013. For Node B (**Fig. 3b**), the tMRCA of 1992 with a 95% HPD interval 1901-1994 indicated  
193 that Floridian and 2014 Haitian strains diverged from the 1994 Haitian DENV4 (JF262782),  
194 almost a decade before its arrival to Florida. However, strain divergence may have occurred in  
195 Haiti and was not necessarily precipitated by its introduction to Manatee County. Therefore,  
196 the introduction timeframe could be more recent than the estimated tMRCA.

197

### 198 ***DENV4 SNVs/Read Analyses***

199 Next, we examined the Manatee DENV4 genome sequences to compare strain variation  
200 between years and to identify mutations unique to the strain that potentially enabled local  
201 adaptation to and/or persistence in local mosquito populations. Following the MCC  
202 phylogenetic analysis, site-specific reads from mosquito populations in Manatee County were  
203 analyzed for single-nucleotide variations (SNVs) by the number of SNVs/read against the  
204 Manatee consensus genome and other global DENV4 genomes (**Fig. 3c**). SNV/read values  
205 showed only 22 SNVs across the 11,650-nucleotide Manatee County genome against all  
206 reads. SNVs were more substantial per read in the other DENV4 genomes. This indicates the  
207 likely persistence of a single strain of DENV4 in Manatee County during 2016-2017  
208 transmission seasons.

209

### 210 ***Signatures of Manatee DENV4 adaptation***

211 We then explored selective pressures on the Manatee County DENV4 strain's coding  
212 sequence that may be functionally important with respect to transmission and persistence of

213 DENV4 in *Floridian aegypti*. The DENV4 genome has 5' and 3' untranslated regions (UTRs)  
214 flanking eight protein-coding genes (non-structural [NS] protein 1, NS2A, NS2B, NS3, NS4A,  
215 the 2K peptide, NS4B, and NS5) (**Fig. 4a**). The protein-coding regions of Manatee DENV4  
216 were compared to four Haitian DENV4 genomes from 1994-2015 and a 1981 Senegalese  
217 DENV4 genome. These were analyzed for all amino acid substitutions between strains, and a  
218 dN/dS analysis was conducted comparing the Senegalese DENV4 genome with Manatee  
219 DENV4 (**Fig. 4a** and **Table S2**). The highest proportions of amino acid substitution were seen  
220 in NS2A and the 2K peptide; simultaneously, the highest dN/dS values occurred for the NS2A  
221 gene, to a point of weak positive selection ( $dN/dS > 1$ ) that covered a V1238T mutation  
222 discussed further herein. We then calculated dN/dS ratios for DENV4 altogether, genotype II,  
223 genotype IIa, and genotype IIb with all sequences available, as well as within the Haiti-Florida  
224 clade and the Haiti-Florida-Puerto-Rico clades (**Fig. 4b**). Purifying selection, which occurs  
225 when non-synonymous mutations are deleterious, dominated, but we found weaker purifying  
226 selection in NS2A and 2K peptide genes, correlating to the Manatee-to-Senegal dN/dS  
227 analysis conducted previously. Values of dN/dS for these genes increased relative to those for  
228 flanking genes for genotype IIb and Caribbean/Florida-specific groups as well (**Fig. 4b**).

229

230 Next, we further analyzed coding sequences in specific regions of the genome to investigate  
231 specific mutations that may have mediated Manatee DENV4 Floridian entry and persistence.  
232 The NS2A gene was analyzed in an alignment between Manatee (MN192436), 1994 Haitian  
233 (JF262782.1), 2014 Haitian #1 (KP140942.1), 2014 Haitian #2 (KT276273.1), 2015 Haitian  
234 (MK514144.1), and 1981 Senegalese (MF004387.1) genomes and a partial DENV4 genome  
235 (AH011951.2, Puerto Rico, 1998), with the analysis targeting three mutations that defined the  
236 1998 DENV4 Puerto Rican outbreak [40] (**Fig. 4c**). The Manatee DENV4 sequence shares

237 these key mutations with 1998 Puerto Rico, 2014 Haiti #1, and 2015 Haiti genomes.  
238 Conversely, the 1981 Senegal sequence and the oldest Haitian sequence from 1994 lack  
239 these mutations. In a selective pressure analysis utilizing the aforementioned 234-genome  
240 assembly, we observed strong background purifying selection with 143 sites that were found  
241 under episodic negative/purifying selection within the NS2A gene. Episodic  
242 diversifying/positive selection (evolutionarily preferred non-synonymous mutation) was  
243 detected in two sites corresponding to amino acids 1,238 and 1,333, both residues localized to  
244 transmembrane segments of the protein. This makes V1238T a mutation of note with the  
245 previous NS2A-associated analysis, detected in different analyses as a point of possible  
246 positive selection. The 2K peptide was next analyzed against the four Haitian genomes and  
247 the Senegalese genome from the first NS2A-specific analysis (**Fig. 4d**), and we observed that  
248 it had the second highest general rate of non-synonymous mutations and had a peak of  
249 weaker purifying selection (**Fig. 4a**). There was only one non-synonymous mutation among the  
250 six genomes, which is significant considering the size of the 2K peptide. This was a T2232A  
251 mutation present solely in the Manatee DENV4 sequence.

252

### 253 ***DENV4 3'-UTR sequence and secondary structure analysis***

254 To complete our genomic analysis of Manatee DENV4, we examined the 3' UTR, as this  
255 region and its derivative subgenomic RNA have been implicated in epidemiologic and  
256 transmission fitness. Although the DENV4 3' UTR lacks one of the two flaviviral nuclease-  
257 resistant RNAs (fNRs) in Domain I as compared to other DENV 3' UTRs (3' UTRs of other  
258 DENV serotypes [1-3]), DENV4 has the same conserved secondary structures in its domain II  
259 and III: two dumbbells (DB1 and DB2), and a 3' end stem-loop (3' SL) (**Fig. S4**). The 3'-UTR,  
260 through structural conformations, can affect viral replication in hosts [41]. We noted several



261 transition substitutions in the DENV4 IIb lineage prior its arrival to Florida (Node B in **Fig. 3b**  
262 and **Fig. S4b**). Most of these mapped to either the highly variable region (HVR) or the adenine-  
263 rich segments that space functional RNA elements in DENV 3' UTRs [42]. The U10318C  
264 substitution in fNR2 (fNR1 present only in other DENV serotypes) and the G10588A  
265 substitution on the 3' SL mapped to base-pairing positions. However, these mutations have  
266 occurred in both directions in other lineages, suggesting they don't imply fitness costs.  
267 Conversely, Floridian DENV4 underwent a rare transversion (A10478U) in a conserved  
268 position in DB2. This substitution favours formation of a new base-pair in DB2 structure.  
269 Additionally, an insertion (10467A) occurred in the adenine-rich segment upstream of DB2; this  
270 insertion is common for all lineages.

271

## 272 **Discussion**

273 Our unbiased metavirome analysis of *Ae. aegypti* from Manatee County has revealed new  
274 insight into human arboviruses and ISV maintenance in a state prone to autochthonous  
275 flavivirus transmission. The observed drop in DENV4 relative to the mosquito virome (ISVs)  
276 between 2016-2017 was statistically significant ( $P=0.035$ ), suggesting that the ISVs influence  
277 persistence of DENV4 in site-specific mosquito populations within the surveyed area.  
278 *Anphevirus* has been shown to reduce DENV viral titers *in vitro* during coinfections [43]. The  
279 abundance of Palmetto *Anphevirus* alongside the observed Palmetto 2016-2017 DENV4  
280 reduction is consistent with this and suggests that these viruses and their respective  
281 abundance or relative proportions within a mosquito impact DENV4 prevalence in the vector  
282 population. The role of natural infections by insect-specific flaviruses on the proliferation of  
283 pathogenic arboviruses carried by different mosquito vector species is equivocal. A mosquito-

284 specific flavivirus we detected known as cell fusing agent virus (CFAV) is of particular interest.  
285 Co-infection studies *in vitro* with DENV2 and CFAV result in enhanced proliferation in both  
286 [44]. Following this notion, the presence of CFAV in the same mosquito populations as DENV4  
287 may improve viral dissemination and maintenance in mosquitoes. The observed correlation  
288 between persistence of DENV4 infection into 2017 in Anna Maria and Cortez mosquitoes with  
289 CFAV abundance in 2016 (**Fig. 1b**) appears to operate in parallel to the research conducted  
290 by Zhang et al. showing the enhanced replication of the two viruses [44]. An important caveat  
291 is that Zhang et al.'s research was conducted *in vitro*. Conversely, Baidaliuk, et al.  
292 demonstrated *in vivo* amplification-restrictive interaction between CFAV and DENV1 [7]. How  
293 DENV4 genotype X mosquito genotype X CFAV genotype interactions ultimately influence the  
294 vector competence of Floridian *Ae. aegypti* mosquitoes remains to be determined. The  
295 observed metavirome patterns sets the stage for follow-up studies to characterize the precise  
296 nature of ISV-DENV-mosquito interactions viz. vector competence.

297

298 The absence of an index human DENV4 case does not preclude the possibility that DENV4  
299 was transmitted locally. Up to 88% of primary DENV infections are asymptomatic, with DENV4  
300 being widely understood to cause primarily subclinical infections [45, 46]. Importantly, clinically  
301 inapparent infections could contribute to 84% of DENV transmission events through  
302 mosquitoes [45], so the threat of local transmission cannot be ruled out. However, it is  
303 noteworthy that DENV4 was detected in adult female mosquitoes reared from wild-captured  
304 eggs, implicating transovarial transmission (TOT) in local *Ae. aegypti* as has been shown for  
305 DENV1 in Key West, Florida [47]. However, since the DENV4 signal measured in 2017 was  
306 lower than in 2016, with two sites losing DENV4 prevalence, TOT alone may have been

307 insufficient to maintain DENV4 from 2016-2017. Furthermore, we suspect that despite  
308 Manatee DENV4's divergence from Haitian strains sometime between 2006-2013, it likely did  
309 not enter Manatee County until 2014 or after, given its similarity to the 2014-2015 Haitian  
310 DENV4 isolates and the fact that TOT is an inefficient process. Tertiary mechanisms, beyond  
311 ISV composition profile and TOT, could include inapparent human-mosquito infection cycles  
312 during the summer transmission (mosquito) season, which may have also contributed to  
313 DENV4 persistence in Manatee County aegypti. The exact mechanisms of maintenance in  
314 mosquitoes and proof of local transmission are difficult to elucidate at this juncture, considering  
315 all mosquito samples were processed for RNASeq and RT-PCR (i.e., no live virus can be  
316 isolated). Importantly, a comprehensive serosurvey with subsequent confirmation by gold-  
317 standard neutralization assay of the population from the four sample collection sites was not  
318 possible within the estimated mean half-life of detectable anti-DENV4 virion IgM or IgG. This  
319 limitation was unavoidable since (i) the complete viral genome assembly and orthogonal  
320 confirmation occurred more than two years following the initial mosquito collections, and (ii)  
321 there are significant confounders and logistical obstacles working with transient worker and  
322 migrant communities in the sampled area (well outside of the current scope of the study).  
323 However, the complete assembly and persistence over two years of an individual strain of  
324 DENV4, which is supported by results from orthogonal analytical approaches, remains  
325 provocative and reveals an unappreciated ecological process for DENV4 transmission in a  
326 non-endemic setting.

327

328 Tracking and predicting arbovirus movement and introduction into the United States, especially  
329 into Florida, can potentially lead to proactive efforts for increased monitoring and vector control  
330 at critical points of introduction into the state. DENV4 has been reported throughout the

331 Caribbean, especially in Puerto Rico, Haiti and more recently in Cuba [48]. Florida has the  
332 largest populations of Puerto Rican, Haitian and Cuban origin and descent in the U.S., and  
333 there are ongoing efforts to develop effectively “sentinel” surveillance programs that can  
334 prepare Florida to deal with potential local arbovirus transmission. As expected, our analysis  
335 suggests a Caribbean origin for the Manatee isolate due to movements of DENV4 into Florida  
336 from Haiti, and preceding this, into Haiti from Puerto Rico. These results concur with previous  
337 findings depicting the Caribbean as a hotspot for arboviral spread in the Americas [48-50].  
338 Diversifying selective pressure in the NS2A gene and the 2K peptide (**Fig. 4a-b**) experienced  
339 by American/Caribbean DENV4 may have contributed to the fixation of mutations driving the  
340 adaptation of DENV4 to environmental/vector conditions in these areas. NS2A mutations that  
341 characterized the 1998 DENV4 outbreak in Puerto Rico [40] are conserved between the  
342 Manatee, Puerto Rican, and two Haitian (JF262782.1 and KT276273.1) genomes (**Fig. 4c**).  
343 The 1981 Senegalese strain, the closest-clustering strain to the Manatee strain isolated  
344 outside the Americas (**Fig. 3a-b**), shares none of these mutations with Manatee DENV4. An in-  
345 depth understanding of how putative “hallmark” mutations in arboviruses can lead to increased  
346 local aegypti mosquito infections is lacking and compels further study.

347

348 We observed the expected 15-nucleotide deletion ( $\Delta 15$ ) in the Manatee DENV4 3' UTR (**Fig.**  
349 **S4**) that is present across all circulating DENV4 strains but absent from the extinct genotype I  
350 DENV4 lineage (GQ868594\_Philippines\_1956). Since the  $\Delta 15$  deletion maps to the HVR, it  
351 does not alter the required secondary structures for sfRNA production. However, the HVR is  
352 an adenylate-rich unfolded spacer with poor sequence conservation—where no reliable  
353 secondary structure can be predicted, as our previous analyses suggested [42]. It has been  
354 speculated that these spacers favor the correct folding of adjacent functional structured RNA

355 elements. The deletion might change the rate of folding of the downstream functional  
356 structured RNA and thus alter sfRNA production levels. Clearly, a closer molecular exploration  
357 of the exact role of this  $\Delta 15$  deletion is needed.

358

359 The potential implications of our findings are profound; especially considering that arboviral  
360 surveillance of mosquito populations during the extended Florida mosquito season (April-  
361 October) is limited. To our knowledge, this is the first reported characterization of a DENV4  
362 infection in native mosquito populations in Florida in the absence of an index human case  
363 across two years in a specific county. These data highlight the importance of knowing when  
364 and where arboviruses are introduced and point to the potential benefit of surveilling local  
365 mosquito populations for arbovirus infections prior to an outbreak. Given the increasing  
366 number of travel-related arbovirus introductions into Florida alone and the risk of local  
367 establishment in the state, we expect that while our report is seminal, it is likely the tip of the  
368 iceberg. If our data are any indication, the number of “under-the-radar” arbovirus infections of  
369 mosquito populations in migration hotspots across the state remains significantly  
370 underestimated.

## **Funding**

This research was supported in part by the United States Centers for Disease Control (CDC) Grant 1U01CK000510-03: Southeastern Regional Center of Excellence in Vector-Borne Diseases: The Gateway Program. The CDC had no role in the design of the study, the collection, analysis, and interpretation of data, or in writing the manuscript. Support was also provided by the University of Florida Emerging Pathogens Institute, the University of Florida Preeminence Initiative, and United States Department of Agriculture, Agricultural research Service, project 6066-21310-005-00-D.

## **Acknowledgements**

We gratefully acknowledge the support of Carina Blackmore, Danielle Stanek, and Andrea Morrison from the Florida Department of Health, as well as Lisa Conti, Kelly Friend, Davis Daiker, and Adriane Rogers from the Florida Department of Agriculture and Consumer Services for their institutional collaboration with the CDC Southeastern Center of Excellence in Vector Borne Diseases: The Gateway Program. We also thank Heather Coatsworth and Kaci McCoy for useful comments. This research was supported in part by the United States Centers for Disease Control (CDC) Grant 1U01CK000510-03: Southeastern Regional Center of Excellence in Vector-Borne Diseases: The Gateway Program. The CDC had no role in the design of the study, the collection, analysis, and interpretation of data, or in writing the manuscript. Support was also provided by the University of Florida Emerging Pathogens Institute, the University of Florida Preeminence Initiative, and United States Department of Agriculture, Agricultural research Service, project 6066-21310-005-00-D.

## Data Availability

Viral RNASeq read data is available in the NCBI Sequence Read Archive and Biosample archive under BioProject PRJNA547758. Genome sequence data for the Manatee sequence is available in NCBI's GenBank database (MN192436) and reference sequences are available in the GenBank database with accession numbers described in the text. Multiple coding DENV4 sequence alignments from the dN/dS analyses and alignments for the RNA secondary structure model in Figure S4 are available with relevant accession numbers in a Mendeley dataset (<https://data.mendeley.com/datasets/kwszjp63rb/draft?a=e11f9b80-bcfb-443b-918d-3016032ef3bd>). The accession numbers in order from top to bottom for the compared sequences in Fig. 4c and 4d are MN192436, AH011951.2, JF262782.1, KP140942.1, KT276273.1, MK514144.1, and MF004387.1 (excluding AH011951.2 for Fig. 4d).

## References

1. World Health Organization, Special Programme for Research and Training in Tropical Diseases. Report of the scientific working group meeting on dengue: Geneva, 1-5 October 2006. Geneva: World Health Organization on behalf of the Special Programme for Research and Training in Tropical Diseases, **2007**.
2. Kraemer MU, Sinka ME, Duda KA, et al. The global compendium of *Aedes aegypti* and *Ae. albopictus* occurrence. *Sci Data* **2015**; 2:150035.
3. Rey JR. Dengue in Florida (USA). *Insects* **2014**; 5:991-1000.
4. Reiskind MH, Lounibos LP. Spatial and temporal patterns of abundance of *Aedes aegypti* L. (*Stegomyia aegypti*) and *Aedes albopictus* (Skuse) [*Stegomyia albopictus* (Skuse)] in southern Florida. *Med Vet Entomol* **2013**; 27:421-9.
5. Romo H, Kenney JL, Blitvich BJ, Brault AC. Restriction of Zika virus infection and transmission in *Aedes aegypti* mediated by an insect-specific flavivirus. *Emerg Microbes Infect* **2018**; 7:181.
6. Schultz MJ, Frydman HM, Connor JH. Dual Insect specific virus infection limits Arbovirus replication in *Aedes* mosquito cells. *Virology* **2018**; 518:406-13.
7. Baidaliuk A, Miot EF, Lequime S, et al. Cell-Fusing Agent Virus Reduces Arbovirus Dissemination in *Aedes aegypti* Mosquitoes. *J Virol* **2019**; 93.
8. Nurk S, Meleshko D, Korobeynikov A, Pevzner PA. metaSPAdes: a new versatile metagenomic assembler. *Genome Res* **2017**; 27:824-34.
9. Buchfink B, Xie C, Huson DH. Fast and sensitive protein alignment using DIAMOND. *Nat Methods* **2015**; 12:59-60.



10. Langmead B, Salzberg SL. Fast gapped-read alignment with Bowtie 2. *Nat Methods* **2012**; 9:357-9.
11. Li H, Handsaker B, Wysoker A, et al. The Sequence Alignment/Map format and SAMtools. *Bioinformatics* **2009**; 25:2078-9.
12. Huson DH, Auch AF, Qi J, Schuster SC. MEGAN analysis of metagenomic data. *Genome Res* **2007**; 17:377-86.
13. van den Boogaart GK, Tolosana-Delgado R, Bren M. (2018). compositions: Compositional Data Analysis. R package version 1.40-2. <https://CRAN.R-project.org/package=compositions>.
14. Fernandes AD, Macklaim JM, Linn TG, Reid G, Gloor GB. ANOVA-like differential expression (ALDEx) analysis for mixed population RNA-Seq. *PLoS One* **2013**; 8:e67019.
15. Fernandes AD, Reid JN, Macklaim JM, McMurrough TA, Edgell DR, Gloor GB. Unifying the analysis of high-throughput sequencing datasets: characterizing RNA-seq, 16S rRNA gene sequencing and selective growth experiments by compositional data analysis. *Microbiome* **2014**; 2:15.
16. Tcherepanov V, Ehlers A, Upton C. Genome Annotation Transfer Utility (GATU): rapid annotation of viral genomes using a closely related reference genome. *BMC Genomics* **2006**; 7:150.
17. Pickett BE, Greer DS, Zhang Y, et al. Virus pathogen database and analysis resource (ViPR): a comprehensive bioinformatics database and analysis resource for the coronavirus research community. *Viruses* **2012**; 4:3209-26.

18. Katoh K, Standley DM. MAFFT multiple sequence alignment software version 7: improvements in performance and usability. *Mol Biol Evol* **2013**; 30:772-80.
19. Katoh K, Standley DM. A simple method to control over-alignment in the MAFFT multiple sequence alignment program. *Bioinformatics* **2016**; 32:1933-42.
20. Nguyen LT, Schmidt HA, von Haeseler A, Minh BQ. IQ-TREE: a fast and effective stochastic algorithm for estimating maximum-likelihood phylogenies. *Mol Biol Evol* **2015**; 32:268-74.
21. Schmidt HA, Strimmer K, Vingron M, von Haeseler A. TREE-PUZZLE: maximum likelihood phylogenetic analysis using quartets and parallel computing. *Bioinformatics* **2002**; 18:502-4.
22. Trifinopoulos J, Nguyen LT, von Haeseler A, Minh BQ. W-IQ-TREE: a fast online phylogenetic tool for maximum likelihood analysis. *Nucleic Acids Res* **2016**; 44:W232-5.
23. Minh BQ, Nguyen MA, von Haeseler A. Ultrafast approximation for phylogenetic bootstrap. *Mol Biol Evol* **2013**; 30:1188-95.
24. Martin DP, Murrell B, Golden M, Khoosal A, Muhire B. RDP4: Detection and analysis of recombination patterns in virus genomes. *Virus Evol* **2015**; 1:vev003.
25. Rambaut A, Lam TT, Max Carvalho L, Pybus OG. Exploring the temporal structure of heterochronous sequences using TempEst (formerly Path-O-Gen). *Virus Evol* **2016**; 2:vev007.
26. Drummond AJ, Suchard MA, Xie D, Rambaut A. Bayesian phylogenetics with BEAUti and the BEAST 1.7. *Mol Biol Evol* **2012**; 29:1969-73.
27. Drummond AJ, Rambaut A. BEAST: Bayesian evolutionary analysis by sampling trees. *BMC Evol Biol* **2007**; 7:214.

28. Hasegawa M, Kishino H, Yano T. Dating of the human-ape splitting by a molecular clock of mitochondrial DNA. *J Mol Evol* **1985**; 22:160-74.
29. Hall MD, Woolhouse ME, Rambaut A. The effects of sampling strategy on the quality of reconstruction of viral population dynamics using Bayesian skyline family coalescent methods: A simulation study. *Virus Evol* **2016**; 2:vew003.
30. Baele G, Lemey P, Bedford T, Rambaut A, Suchard MA, Alekseyenko AV. Improving the accuracy of demographic and molecular clock model comparison while accommodating phylogenetic uncertainty. *Mol Biol Evol* **2012**; 29:2157-67.
31. Xie W, Lewis PO, Fan Y, Kuo L, Chen MH. Improving marginal likelihood estimation for Bayesian phylogenetic model selection. *Syst Biol* **2011**; 60:150-60.
32. Yu G, Smith DK, Zhu H, Guan Y, Lam TT. ggtree: an R package for visualization and annotation of phylogenetic trees with their covariates and other associated data. *Methods Ecol Evol* **2017**; 8:28-36.
33. Pond SL, Frost SD, Muse SV. HyPhy: hypothesis testing using phylogenies. *Bioinformatics* **2005**; 21:676-9.
34. Pond SL, Frost SD. Datamonkey: rapid detection of selective pressure on individual sites of codon alignments. *Bioinformatics* **2005**; 21:2531-3.
35. Murrell B, Moola S, Mabona A, et al. FUBAR: a fast, unconstrained bayesian approximation for inferring selection. *Mol Biol Evol* **2013**; 30:1196-205.
36. Murrell B, Wertheim JO, Moola S, Weighill T, Scheffler K, Kosakovsky Pond SL. Detecting individual sites subject to episodic diversifying selection. *PLoS Genet* **2012**; 8:e1002764.

37. Steinway SN, Dannenfelser R, Laucius CD, Hayes JE, Nayak S. JCoDA: a tool for detecting evolutionary selection. *BMC Bioinformatics* **2010**; 11:284.
38. Kosakovsky Pond SL, Frost SD. Not so different after all: a comparison of methods for detecting amino acid sites under selection. *Mol Biol Evol* **2005**; 22:1208-22.
39. Weaver S, Shank SD, Spielman SJ, Li M, Muse SV, Kosakovsky Pond SL. Datamonkey 2.0: a modern web application for characterizing selective and other evolutionary processes. *Mol Biol Evol* **2018**.
40. Bennett SN, Holmes EC, Chirivella M, et al. Selection-driven evolution of emergent dengue virus. *Mol Biol Evol* **2003**; 20:1650-8.
41. Gebhard LG, Filomatori CV, Gamarnik AV. Functional RNA elements in the dengue virus genome. *Viruses* **2011**; 3:1739-56.
42. Finol E, Ooi EE. Evolution of Subgenomic RNA Shapes Dengue Virus Adaptation and Epidemiological Fitness. *iScience* **2019**; 16:94-105.
43. Parry R, Asgari S. *Aedes Anphevirus*: an Insect-Specific Virus Distributed Worldwide in *Aedes aegypti* Mosquitoes That Has Complex Interplays with Wolbachia and Dengue Virus Infection in Cells. *J Virol* **2018**; 92:45.
44. Zhang G, Asad S, Khromykh AA, Asgari S. Cell fusing agent virus and dengue virus mutually interact in *Aedes aegypti* cell lines. *Sci Rep* **2017**; 7:6935.
45. Ten Bosch QA, Clapham HE, Lambrechts L, et al. Contributions from the silent majority dominate dengue virus transmission. *PLoS Pathog* **2018**; 14:e1006965.
46. Vaughn DW, Green S, Kalayanarooj S, et al. Dengue viremia titer, antibody response pattern, and virus serotype correlate with disease severity. *J Infect Dis* **2000**; 181:2-9.

47. Buckner EA, Alto BW, Lounibos LP. Vertical transmission of Key West dengue-1 virus by *Aedes aegypti* and *Aedes albopictus* (Diptera: Culicidae) mosquitoes from Florida. *J Med Entomol* **2013**; 50:1291-7.
48. Mavian C, Dulcey M, Munoz O, Salemi M, Vittor AY, Capua I. Islands as Hotspots for Emerging Mosquito-Borne Viruses: A One-Health Perspective. *Viruses* **2018**; 11.
49. Blohm G, A Elbadry M, Mavian C, et al. Mayaro as a Caribbean traveler: Evidence for multiple introductions and transmission of the virus into Haiti. *Int J Infect Dis* **2019**.
50. White SK, Mavian C, Salemi M, et al. A new "American" subgroup of African-lineage Chikungunya virus detected in and isolated from mosquitoes collected in Haiti, 2016. *PLoS One* **2018**; 13:e0196857.

## **Footnotes**

### **Conflicts of Interest**

The authors declare that there are no competing interests.

### **Funding Statement**

This research was supported in part by the CDC (<https://www.cdc.gov/>) Grant 1U01CK000510-03: Southeastern Regional Center of Excellence in Vector-Borne Diseases: The Gateway Program. The CDC had no role in the design of the study, the collection, analysis, and interpretation of data, or in writing the manuscript. Support was also provided by the University of Florida Emerging Pathogens Institute and the University of Florida Preeminence Initiative to RRD for this study. Mention of trade names or commercial products in this report is solely for the purpose of providing specific information and does not imply recommendation or endorsement by the U.S. Department of Agriculture.

Correspondence and requests for reprints should be sent to Dr. Rhoel R. Dinglasan. His e-mail address is [rdinglasan@epi.ufl.edu](mailto:rdinglasan@epi.ufl.edu). His FAX number is 352-392-9704 and his telephone number is 352-294-8448. His professional address is 2055 Mowry Road, 32611, Gainesville, FL.

## **Figure Legends**

**Figure 1. Metaviromic analysis of *Aedes aegypti* mosquito populations from Manatee County, Florida.** (a) Locations of ovitraps in four different locations in Manatee County: Palmetto, Cortez, Ana Maria Island and Longboat Key. (b) The relative abundance of reads identified to come from RNA viruses in the 8 metagenomes. The proportion of the sub-composition is summarized at the species level for most viruses; however, some viruses were classified at higher levels if species could not be determined by the lowest common ancestor method.

**Figure 2. Mapping of RNASeq reads on the DENV4 genome.** Coverage plots for DENV4 genome readings are shown from top to bottom graph panels. Coverage values across the genome for collection site/year combinations. Coverage is depicted on each y-axis and amino acid position on the x-axes. The smoothed central lines on the graphs indicate median values.

**Figure 3. Phylogenetic and phylodynamic analyses of Manatee DENV4.** (a) Maximum likelihood phylogenetic analysis of DENV4 full genome sequences. ML tree was obtained using IQ-TREE [20] software, diamonds indicate strong statistical support along the branches defined by ultrafast bootstrap >90. Tips are labeled and colored based on country of origin. (b) Bayesian phylodynamic reconstruction of DENV4 genotype IIb strains. The Maximum Clade Credibility time-scaled phylogenetic maximum clade credibility tree inferred using relaxed clock and constant demographic priors implemented in BEAST v1.8.4. Circles represent branches supported by posterior probability >0.90. Tips are colored based on location of origin. Labeled are nodes A (time of the most recent common ancestor [tMRCA] 2010), B (tMRCA 1992), and

C (tMRCA 1981) on the branches. **(c)** SNVs/read per collection site/year combination of mosquitoes with significant detection by viral RNASeq in comparison to various reference genomes shown as a distance matrix is shown. The total numbers of SNVs were normalized by the total numbers of reads from each sample. Cell values refer to the SNV/read ratios of every sample (column) as compared to every representative sequence (rows). Cells are color-coded in the matrix as red = 0.0 SNV/read; white = 1.5 SNV/read; and blue = > 3 SNV/read.

**Figure 4. DENV4 amino acid analyses.** **(a)** A dN/dS analysis conducted for the whole coding region of DENV4 Manatee vs. the Senegalese genome from 1981 (MF004387.1). The analysis was conducted utilizing full genome coding sequences in JCoDA using a sliding window analysis with a window size of 10. A small genome schematic is placed below the graph to its scale. Line colors approaching red from orange lie at higher values on the graph to indicate high dN/dS values. **(b)** Using all available sequences, a dN/dS comparison was conducted to calculate mean ratio values within DENV4 overall, DENV4 genotype II, DENV4 genotype IIb, DENV4 FL-American-Caribbean clades, and DENV4-Florida-Caribbean-specific clades (respectively moving along Nodes C, B, and A from fig. 3B). Adjacent to the IIb-containing comparison, a comparison between all available DENV4 genome sequences, DENV4 genotype II, and DENV4 genotype IIa is depicted. **(c)** A comparative amino acid sequence alignment of Manatee County (MN192436), Puerto Rican (AH011951.2), Haitian 1994 (JF262782.1), Haitian 2014 #1 (KP140942.1), Haitian 2014 #2 (KT276273.1), Haitian 2015 (MK514144.1), and 1981 Senegalese (MF004387.1) genome sequences for the NS2A region sequenced in Puerto Rican isolate genomes by Bennet et al. [40]. Amino acid positions are numbered at the top of the figure. Key amino acid changes defining the 1998 DENV4 Puerto



Rican outbreak in the NS2A gene are highlighted with boxes. **(d)** A comparison of the 2K peptide (colored in grey) sequence between the Manatee County (MN192436), 1994 Haitian (JF262782.1), Haitian 2014 #1 (KP140942.1), Haitian 2014 #2 (KT276273.1), Haitian 2015 (MK514144.1), and 1981 Senegalese (MF004387.1) genomes. Uncolored portions of the sequences correlate to portions of NS4A and NS4B.

### **Supplementary Figure Legends**

**Figure S1. RNASeq read-proportion analyses.** To analyze the read abundance of the RNASeq assay conducted on the mosquito samples from Manatee county, the proportion of DENV4-mapped reads to the total number of reads mapped for each site and year pool was calculated. The number of reads that mapped specifically to DENV4 was divided by the total number of reads mapped, the resultant values being shown above the bars on the graph. Proportion values are on the y-axis of the graph.

**Figure S2. Assessment of phylogenetic quality for DENV4 strains. (a,c)** Phylogenetic signal, nucleotide substitution saturation and phylogenetic relationship in HIV envelope sequences from six patients obtained after ATI. Evaluation of the presence of phylogenetic signal satisfying resolved phylogenetic relationships among sequences was assessed by likelihood mapping (IQ-TREE: <http://www.iqtree.org/>), which estimates the likelihood of each of the three possible tree topologies for each group of four sequences (quartet) in the data set using the best-fit nucleotide substitution model chosen according to Bayesian Information Criterion (BIC). Quartets are considered “resolved” when the three likelihood are significantly different (phylogenetic signal), unresolved or partially resolved, when all three likelihood values

or two of them are not significantly different (phylogenetic noise). Percentage within each triangle, indicate the proportion of resolved quartets (in the three corner areas), as well as the proportion of partially resolved (side areas) or unresolved (center) quartets. Extensive simulation studies have shown that side/center areas including <40% of the unresolved quartets can be considered robust in terms of phylogenetic signal [1,2]. **(b,d)** Substitution saturation, which decreases the phylogenetic information contained in the sequences, was assessed using DAMBE7 (<http://dambe.bio.uottawa.ca/DAMBE/>) by plotting pairwise nucleotide (blue) transition (s) and (green) transversion (v) substitutions (y-axis) versus pairwise genetic distance (x-axis) determined with the Tamura and Nei 1993 (TN93) nucleotide substitution model [3].

**Figure S3. Assessment of temporal signal for DENV4 strains.** The plot represents regression analysis of root-to-tip genetic distance assessed using TempEst v1.5. The positive slope ( $R^2=0.7135$ ) indicates presence of temporal signal for the dataset.

**Figure S4. DENV4 3' UTR Analyses. (a)** Alignment with the 3'-UTR of Manatee DENV4. The 3'-UTR RNA sequence alignment is of DENV4 from Manatee County, DENV4 Haiti 2014 #2 (KT276273.1), and DENV4 Philippines H241 (KR011349.2) genomes. The DENV4 RNA sequence alignment was generated with CLC Sequence Viewer 8.0 (<https://www.qiagenbioinformatics.com/products/clc-main-w>). Some DENV4 conserved 3' UTR regions are designated in black boxes in the figure, including repeated conserved sequence 2 (RCS2), conserved sequence 1 (CS1), conserved sequence 2 (CS2), and 3' upstream AUG region (3' UAR). Different nucleotides are designated with different colors. **(b)** A diagram of the

secondary structure of the DENV4 Manatee County 3' UTR is depicted with key nucleotides and mutations highlighted and drawn in orange, correlating to nodes A or B from fig. 3B. Key secondary structure regions of the 3' UTR are shown in black text: dumbbells 1-2 (DB1 & DB2), pseudoknots 1-5 (PK1-5), flavivirus nuclease-resistant RNA (fNR2), and the 3' stem loop (3' SL).

1 a

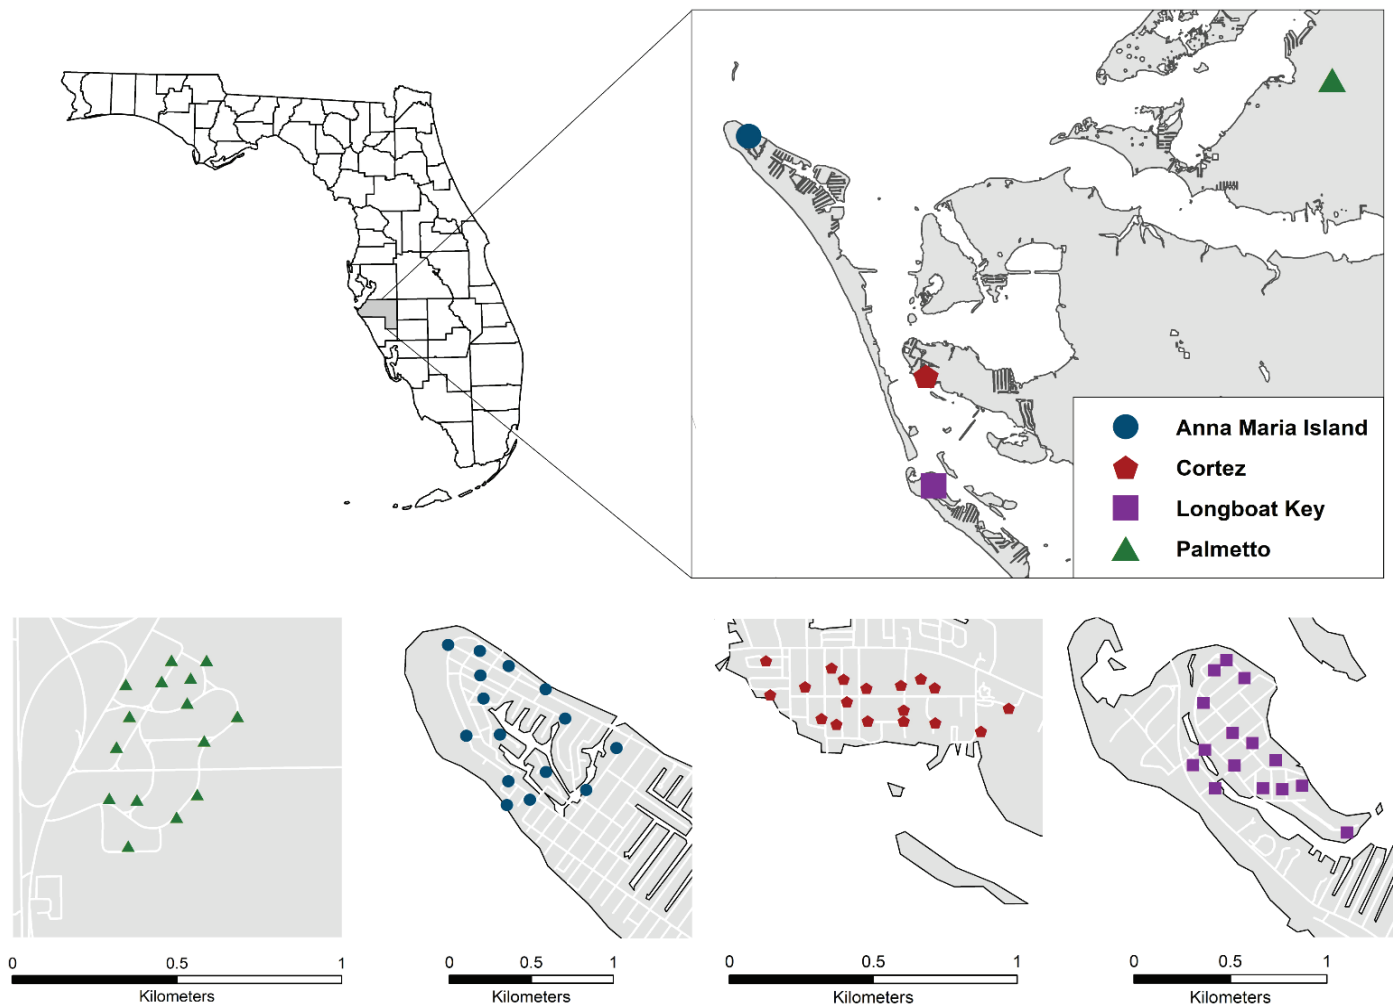

b

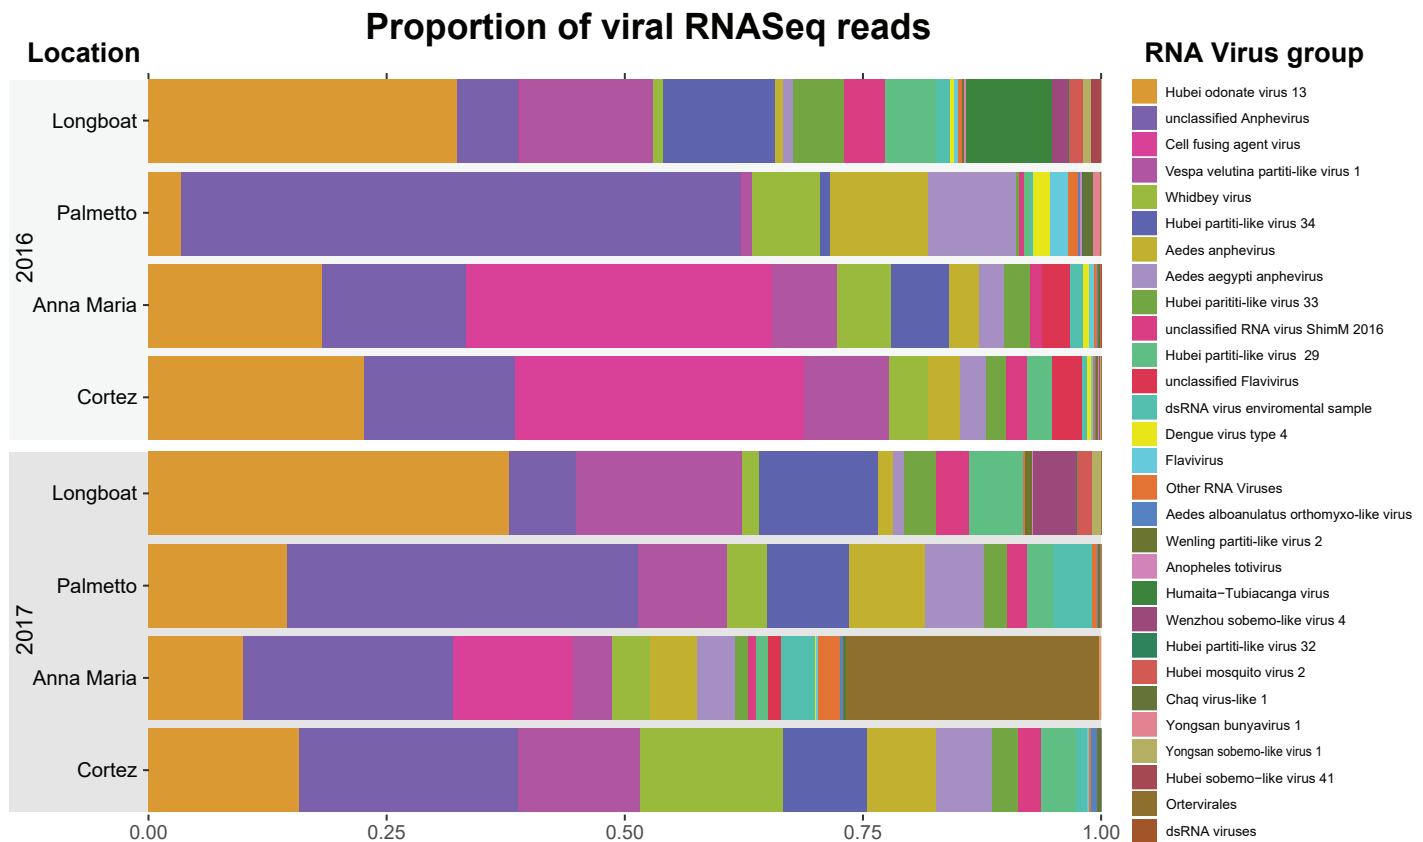

**Figure 1. Metaviromic analysis of *Aedes aegypti* mosquito populations from Manatee County, Florida. (a) Locations of ovi-traps in four different locations in Manatee County: Palmetto, Cortez, Ana Maria Island and Longboat Key. (b) The relative abundance of reads identified to come from RNA viruses in the 8 metagenomes. The proportion of the sub-composition is summarized at the species level for most viruses; however, some viruses were classified at higher levels if species could not be determined by the lowest common ancestor method.**

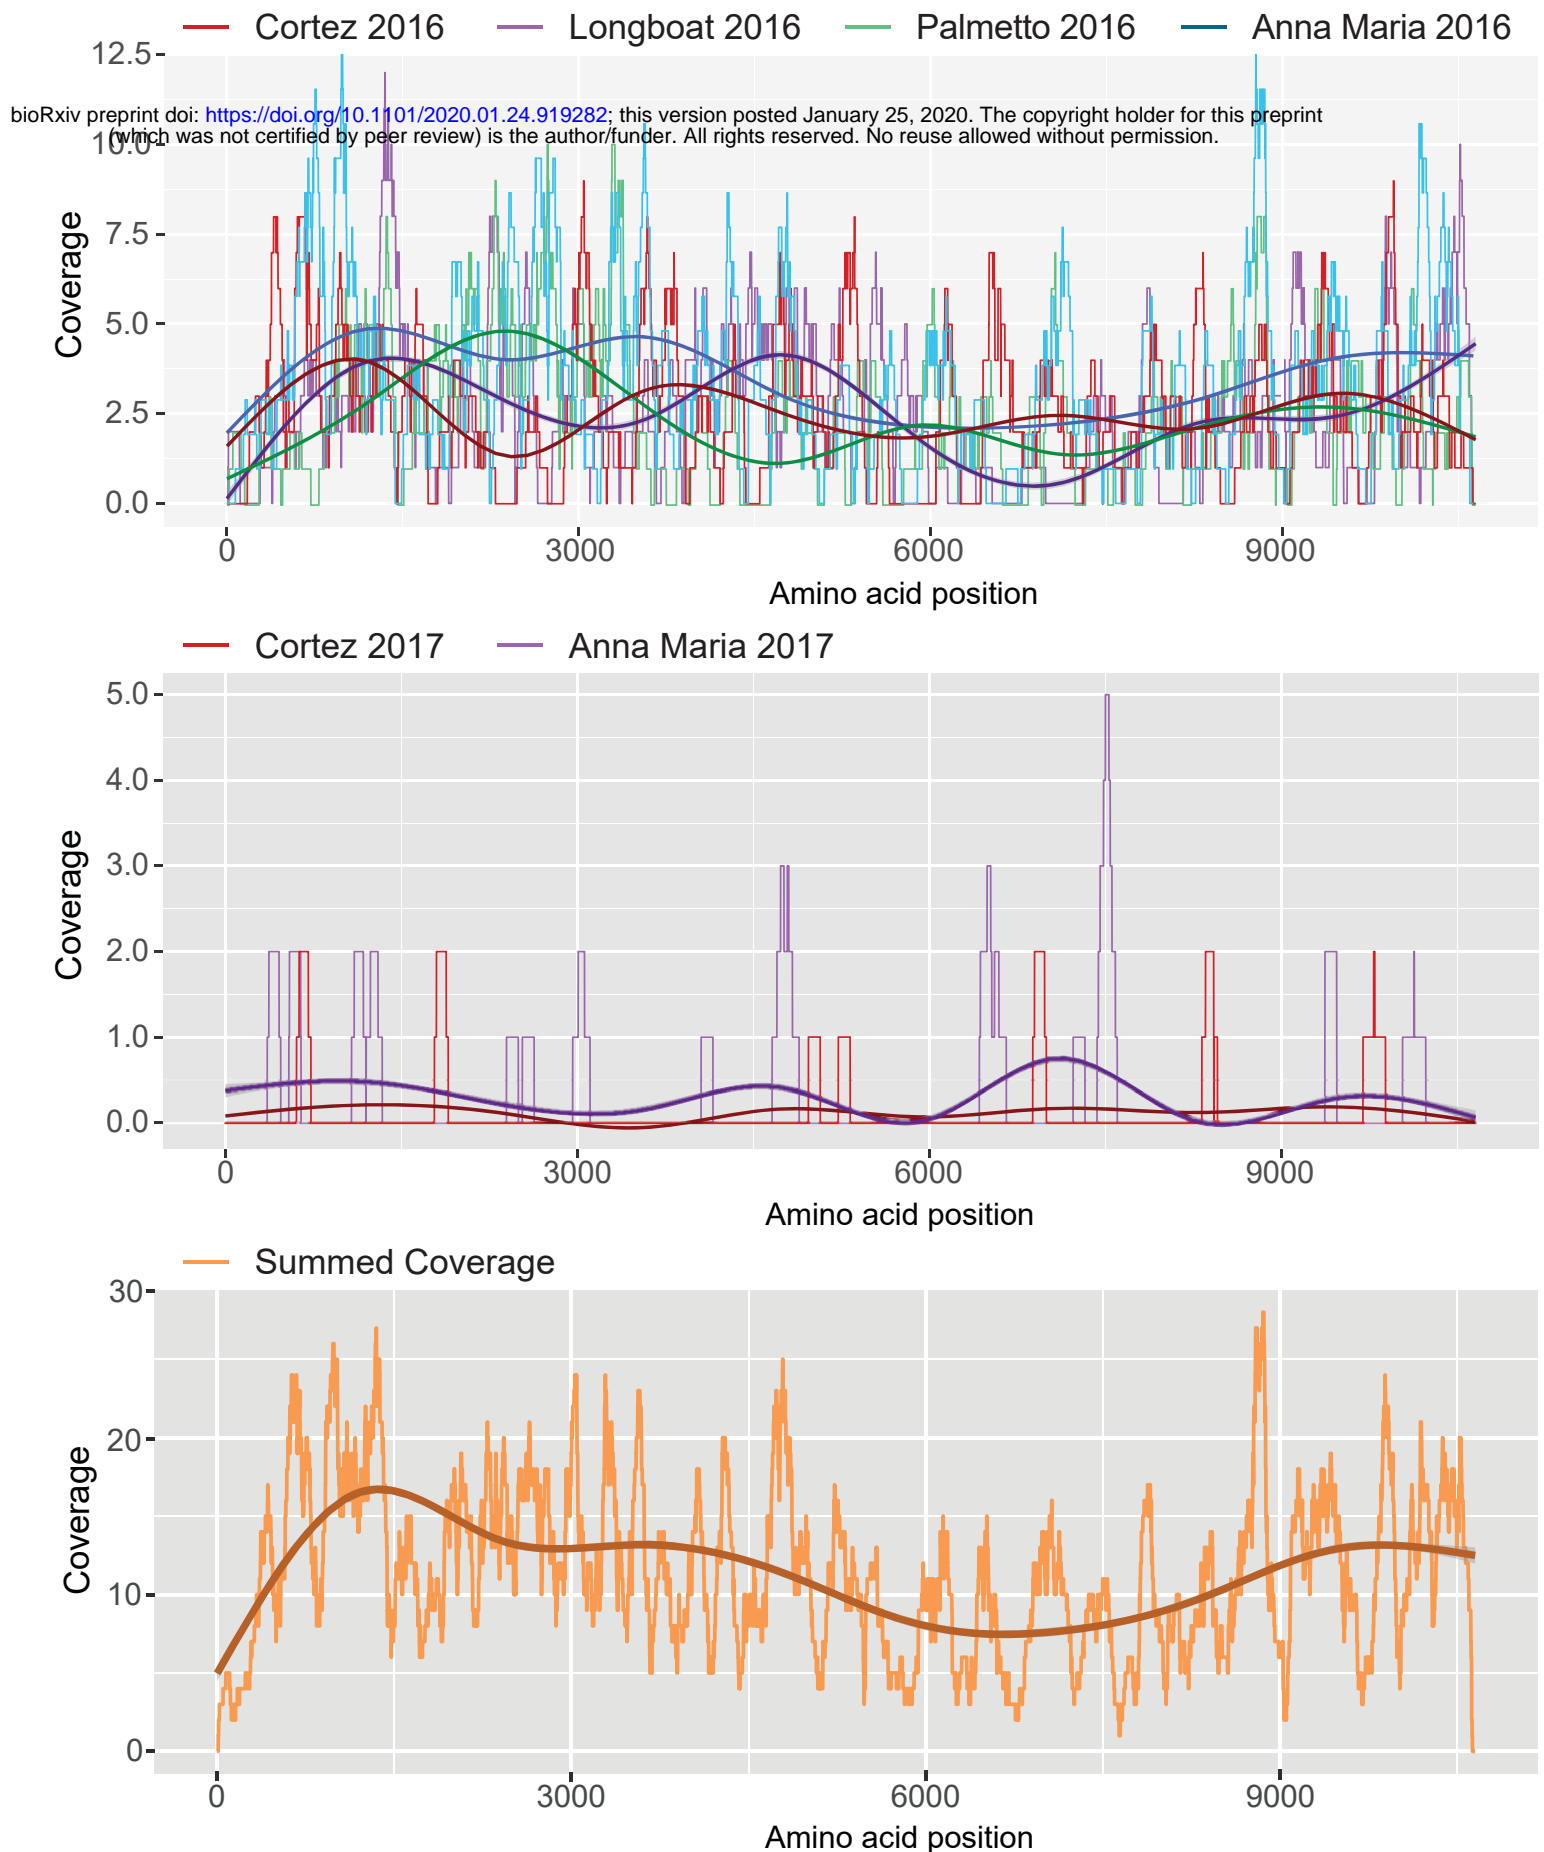

**Figure 2. Mapping of RNASeq reads on the DENV4 genome.** Coverage plots for DENV4 genome readings are shown from top to bottom graph panels. Coverage values across the genome for collection site/year combinations. Coverage is depicted on each y-axis and amino acid position on the x-axes. The smoothed central lines on the graphs indicate median values.

3 a

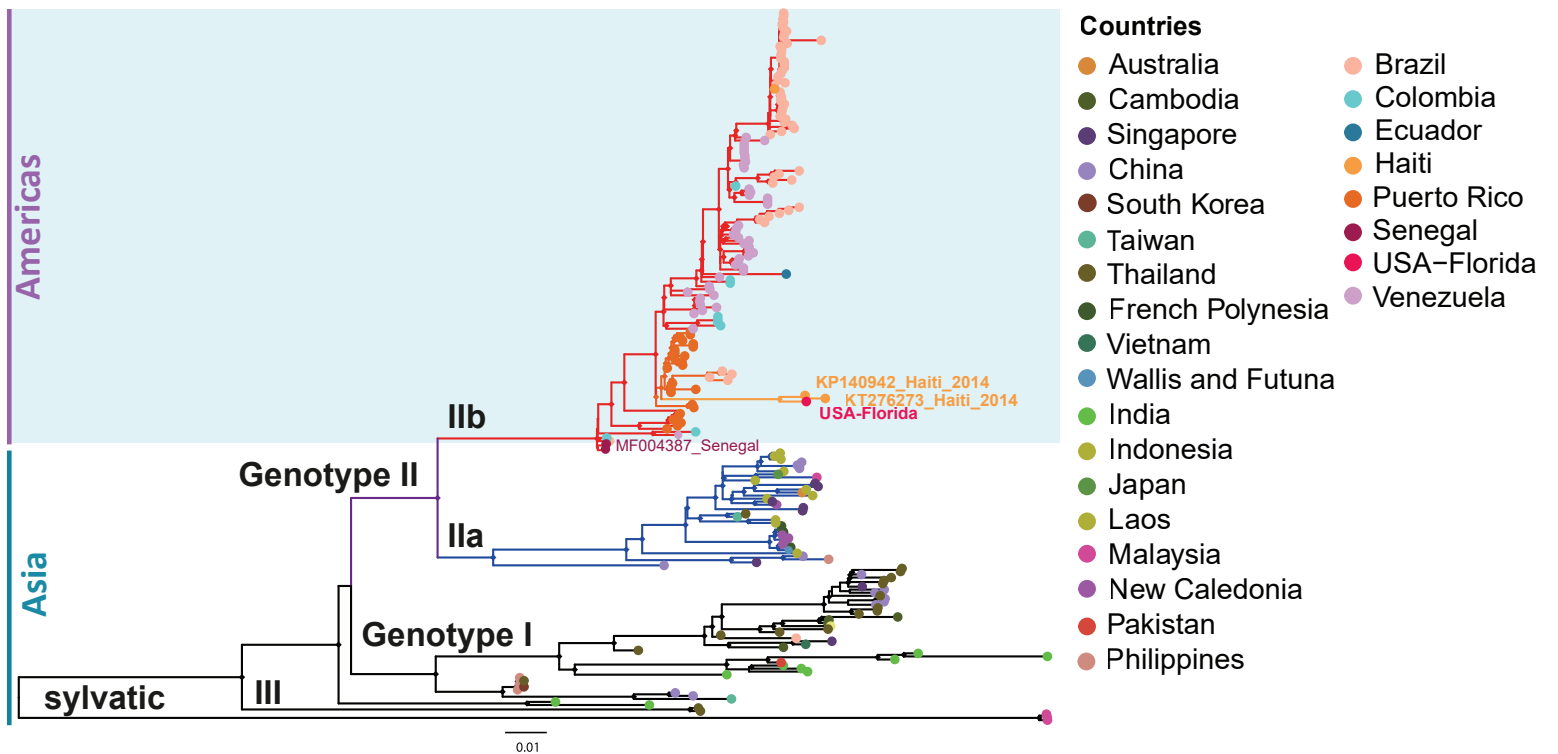

b

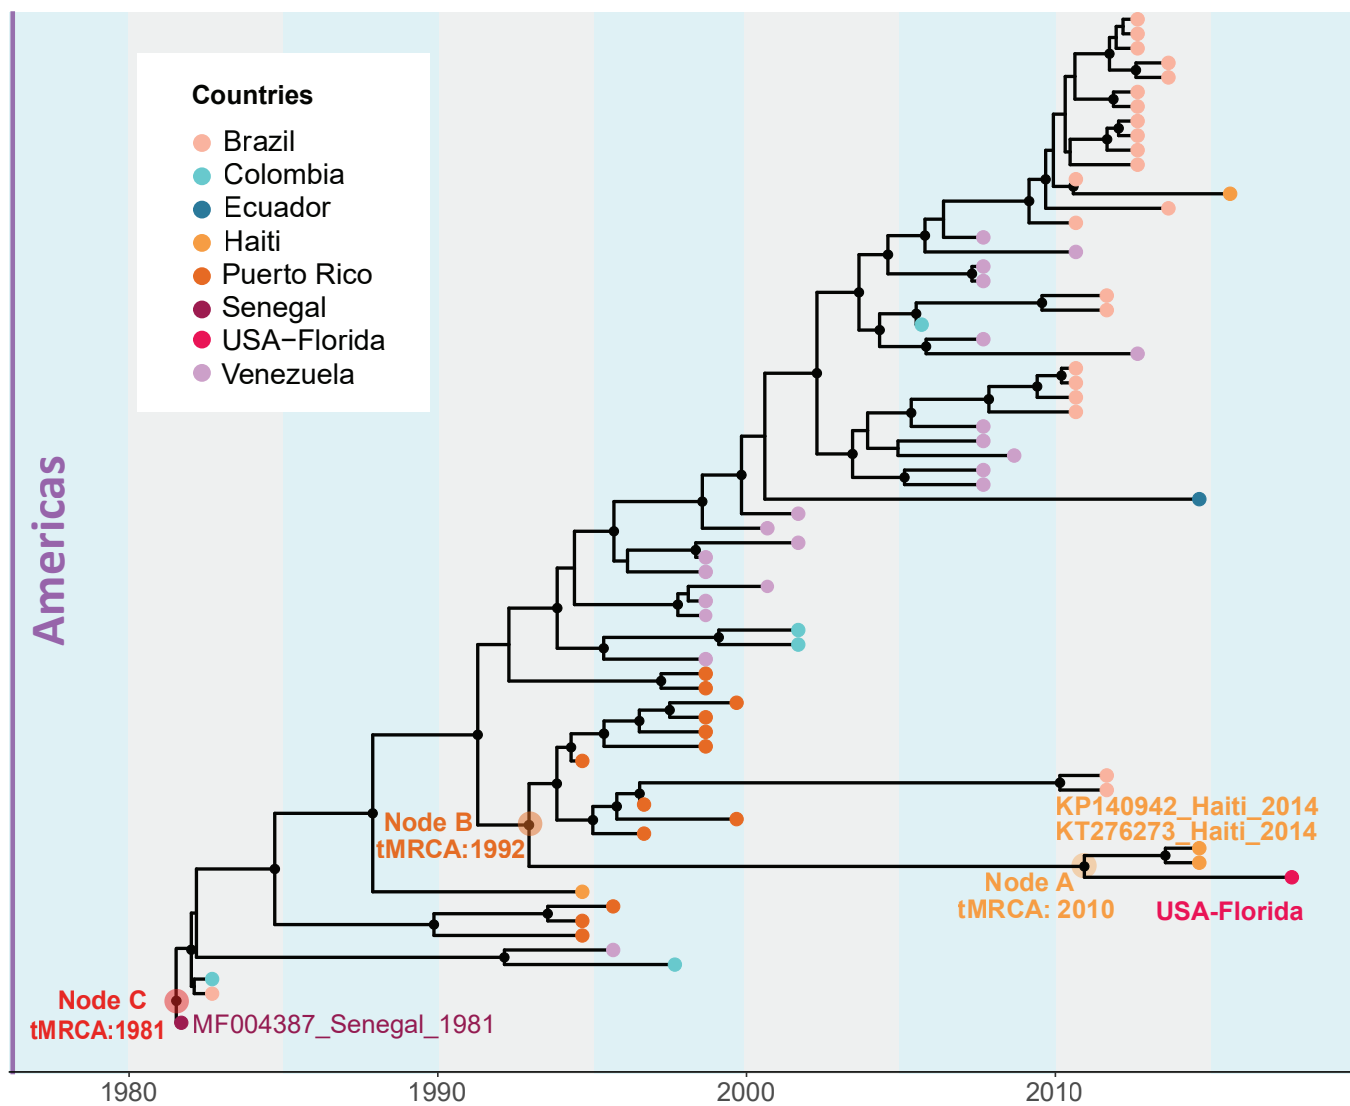

c

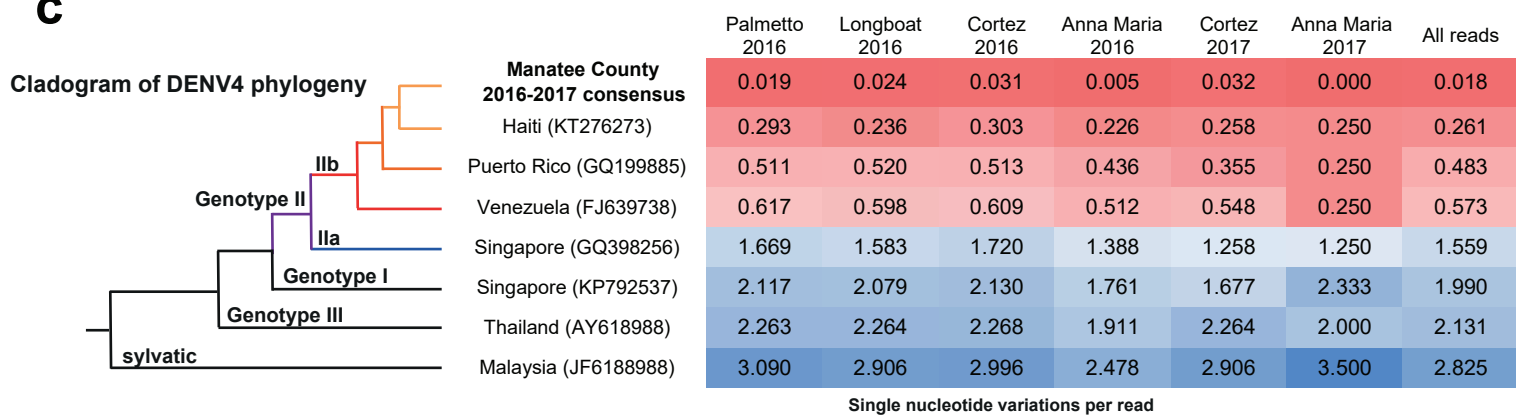

**Figure 3. Phylogenetic and phylodynamic analyses of Manatee DENV4. (a)** Maximum likelihood phylogenetic analysis of DENV4 full genome sequences. ML tree was obtained using IQ-TREE [20] software, diamonds indicate strong statistical support along the branches defined by ultrafast bootstrap >90. Tips are labeled and colored based on country of origin. **(b)** Bayesian phylodynamic reconstruction of DENV4 genotype IIb strains. The Maximum Clade Credibility time-scaled phylogenetic maximum clade credibility tree inferred using relaxed clock and constant demographic priors implemented in BEAST v1.8.4. Circles represent branches supported by posterior probability >0.90. Tips are colored based on location of origin. Labeled are nodes A (time of the most recent common ancestor [tMRCA] 2010), B (tMRCA 1992), and C (tMRCA 1981) on the branches. **(c)** SNVs/read per collection site/year combination of mosquitoes with significant detection by viral RNaseq in comparison to various reference genomes shown as a distance matrix is shown. The total numbers of SNVs were normalized by the total numbers of reads from each sample. Cell values refer to the SNV/read ratios of every sample (column) as compared to every representative sequence (rows). Cells are color-coded in the matrix as red = 0.0 SNV/read; white = 1.5 SNV/read; and blue = > 3 SNV/read.

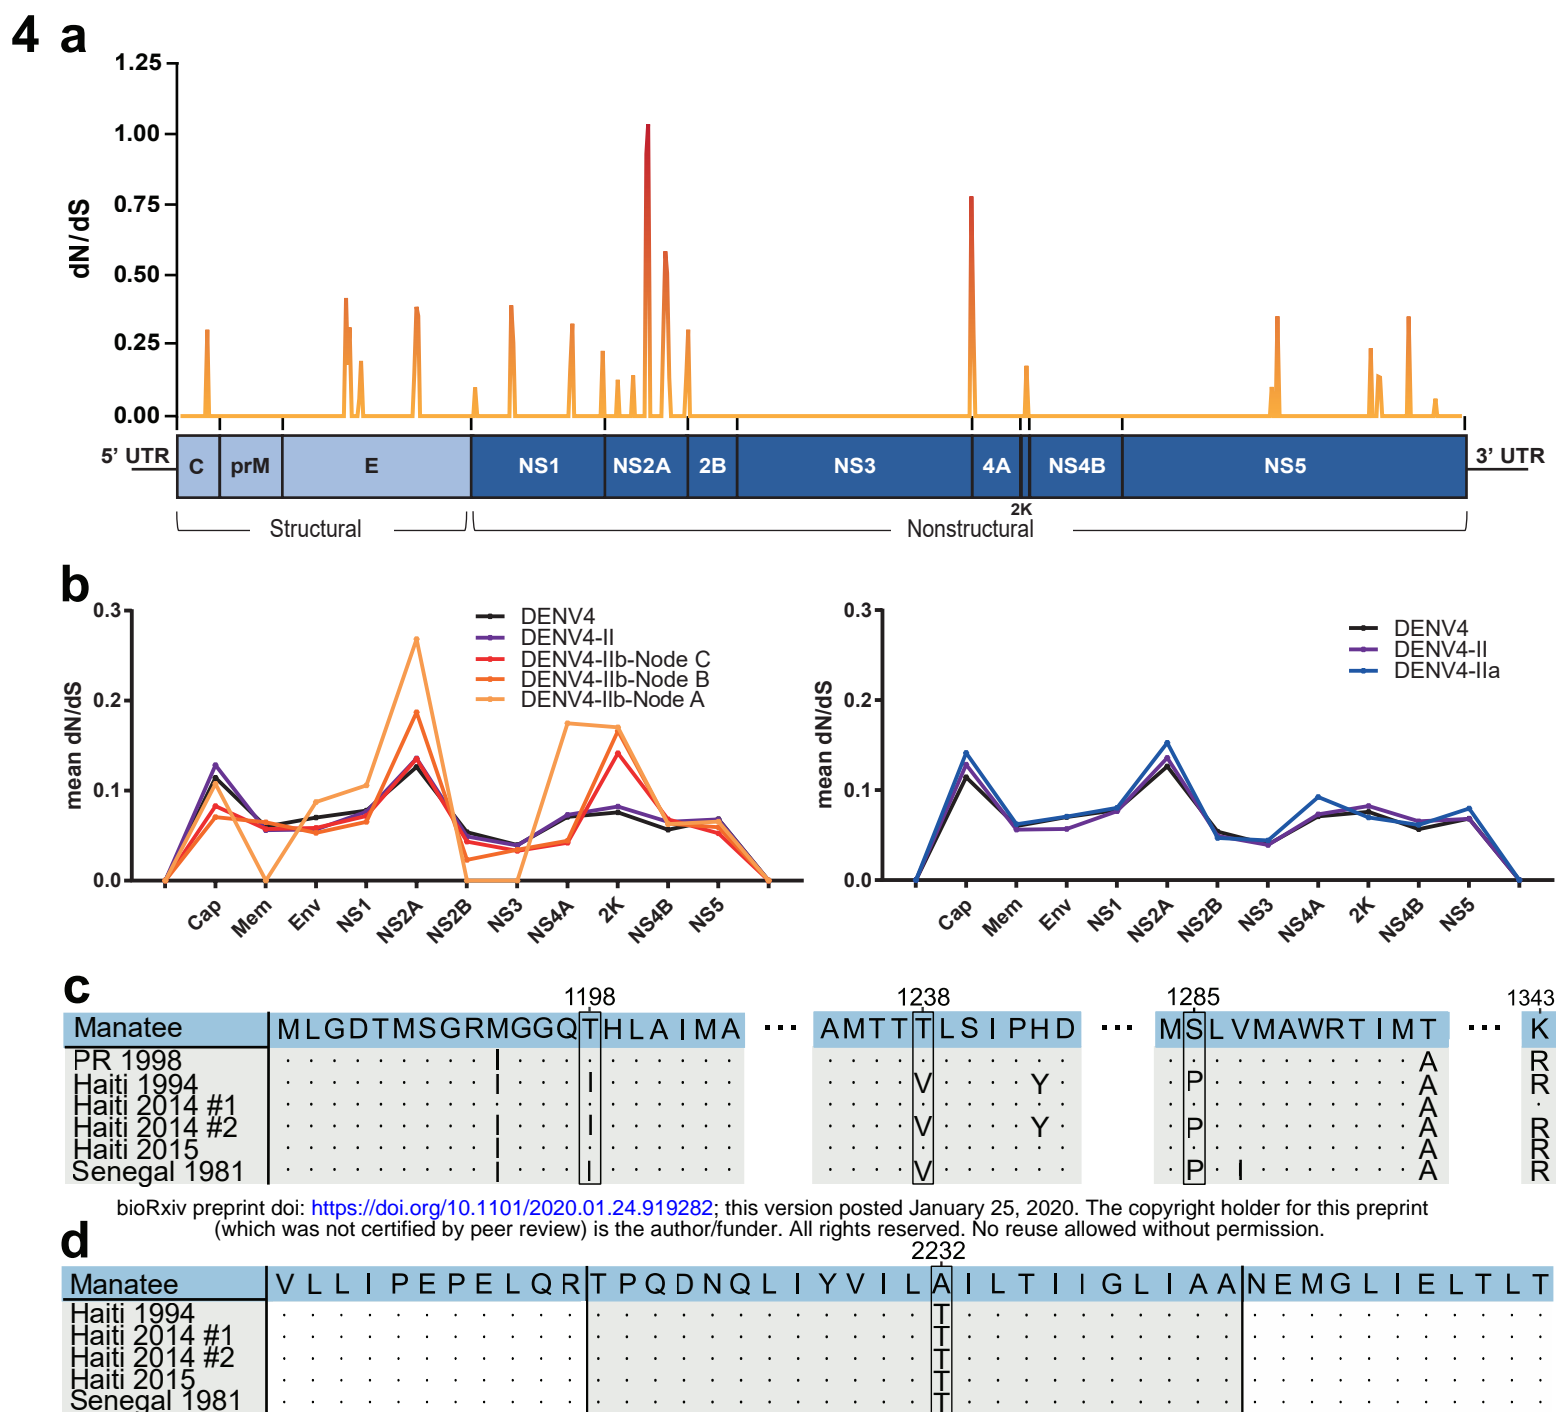

**Figure 4. DENV4 amino acid analyses. (a)** A dN/dS analysis conducted for the whole coding region of DENV4 Manatee vs. the Senegalese genome from 1981 (MF004387.1). The analysis was conducted utilizing full genome coding sequences in JCoDA using a sliding window analysis with a window size of 10. A small genome schematic is placed below the graph to its scale. Line colors approaching red from orange lie at higher values on the graph to indicate high dN/dS values. **(b)** Using all available sequences, a dN/dS comparison was conducted to calculate mean ratio values within DENV4 overall, DENV4 genotype II, DENV4 genotype IIb, DENV4 FL-American-Caribbean clades, and DENV4-Florida-Caribbean-specific clades (respectively moving along Nodes C, B, and A from fig. 3B). Adjacent to the IIb-containing comparison, a comparison between all available DENV4 genome sequences, DENV4 genotype II, and DENV4 genotype IIa is depicted. **(c)** A comparative amino acid sequence alignment of Manatee County (MN192436), Puerto Rican (AH011951.2), Haitian 1994 (JF262782.1), Haitian 2014 #1 (KP140942.1), Haitian 2014 #2 (KT276273.1), Haitian 2015 (MK514144.1), and 1981 Senegalese (MF004387.1) genome sequences for the NS2A region sequenced in Puerto Rican isolate genomes by Bennet et al. [40]. Amino acid positions are numbered at the top of the figure. Key amino acid changes defining the 1998 DENV4 Puerto Rican outbreak in the NS2A gene are highlighted with boxes. **(d)** A comparison of the 2K peptide (colored in grey) sequence between the Manatee County (MN192436), 1994 Haitian (JF262782.1), Haitian 2014 #1 (KP140942.1), Haitian 2014 #2 (KT276273.1), Haitian 2015 (MK514144.1), and 1981 Senegalese (MF004387.1) genomes. Uncolored portions of the sequences correlate to portions of NS4A and NS4B.
